# Supplementary material for: Activating PTEN Tumor Suppressor Expression with the CRISPR/dCas9 System
Source: PubMed Central journal article supplement — Mol Ther Nucleic Acids. 2018 Dec 14;14:287–300. doi: 10.1016/j.omtn.2018.12.003 (PMC6348769; doi:10.1016/j.omtn.2018.12.003), 2018-12-14
Supplement: mmc1.pdf [file mmc1.pdf]

OMTN, Volume 14

## Supplemental Information

### **Activating *PTEN* Tumor Suppressor Expression with the CRISPR/dCas9 System**

**Colette Moses, Fiona Nugent, Charlene Babra Waryah, Benjamin Garcia-Bloj, Alan R. Harvey, and Pilar Blancafort**

**Supplementary Fig. 1. Structure of the pLV\_dCas9-VPR\_sgRNA construct for stable expression of the *PTEN* CRISPR activation system.** sgRNA is expressed from the hU6 promoter. Humanized *S. pyogenes* dCas9-VP64-p65-Rta (VPR), in direct fusion with FLAG epitope tag and 2x nuclear localization signal (NLS), is expressed from the hUbc promoter, followed by the T2A cleavable linker and puromycin resistance gene (Puro). 5' and 3' long terminal repeat (LTR) sequences are indicated.

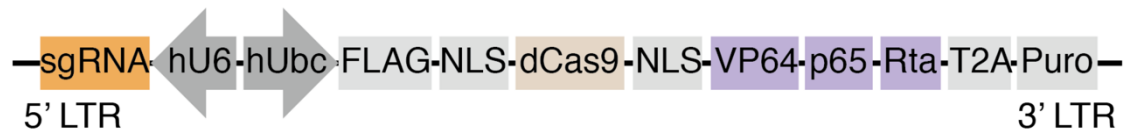

**Supplementary Fig. 2. *PTEN* expression is not affected by dCas9 with no VPR activation domain, or dCas9-VPR in absence of *PTEN*-targeting sgRNAs.** SUM159 cells were transiently transfected with either empty vector, dCas9 with no effector domain with *PTEN*-targeting sgRNAs, or dCas9-VPR with sgRNAs targeting the unrelated gene *MASPIN*. There were no significant changes in *PTEN* mRNA expression, n=3.

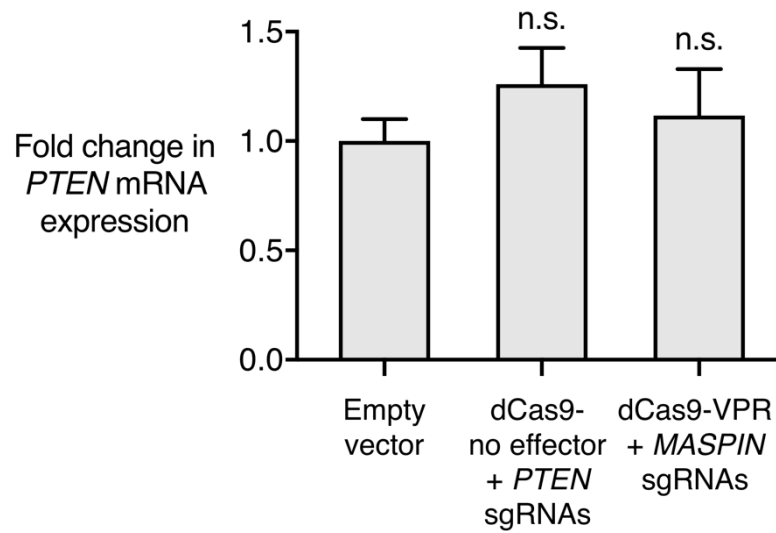

**Supplementary Fig. 3. *PTEN* activation reduces proliferation in the SK-MEL-28 melanoma cell line.** A: Immunofluorescence staining of Ki67 protein in SK-MEL-28 cells that stably express dCas9-VPR with no sgRNA, *PTEN* sgRNA -54, or a mix of four sgRNAs targeting *PTEN*. Scale bar represents 200  $\mu$ m. B: Quantification of the percentage of Ki67 positive (+) cells in the population. \*  $p < 0.05$ ,  $n = 3$ , error bars show SEM.

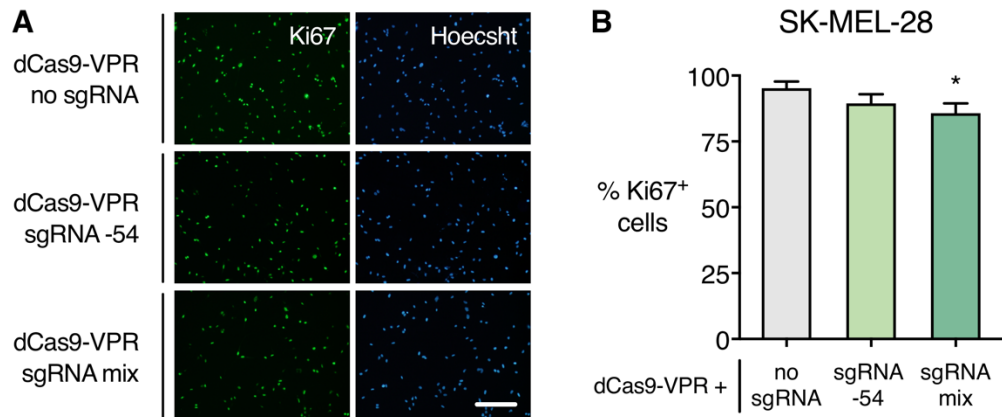

**Supplementary Fig. 4. *PTEN* activation confers increased sensitivity to the B-Raf inhibitor dabrafenib in the SK-MEL-28 *BRAF*-mutant melanoma cell line.** Graph shows cell viability after for 72-hour dabrafenib treatment in SK-MEL-28 cells stably expressing dCas9 with no sgRNA, *PTEN* sgRNA -54, or a mix of four sgRNAs targeting the *PTEN* proximal promoter. \*\*  $p < 0.01$ ,  $n = 3$ , error bars show SEM.

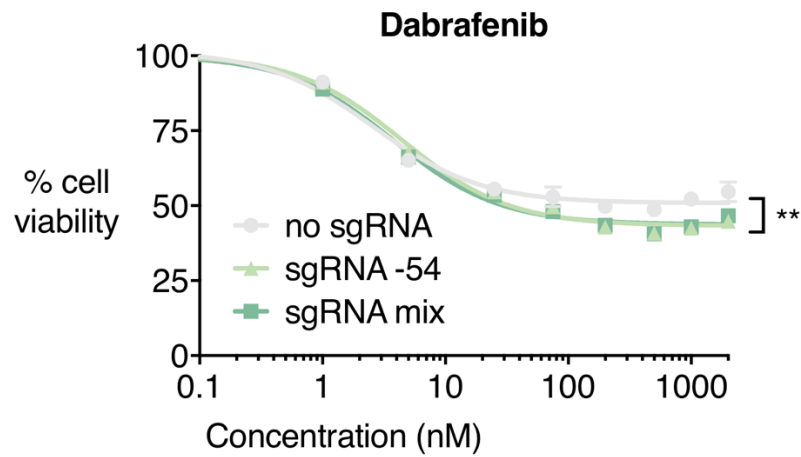

**Supplementary Fig. 5. Western blot membranes from Fig. 1 and Fig. 3.** Uncropped images of each blot, as well as images superimposed with protein standards (Precision Plus Protein Kaleidoscope Prestained Protein Standards, Bio-Rad), are shown. Red numbers refer to the size in kDa of the relevant target protein. Black numbers refer to the size in kDa of the protein standard. In the Western blots from Fig. 3, each image displays two independent biological replicates.

Western blots from Figure 1

SK-MEL-28

PTEN

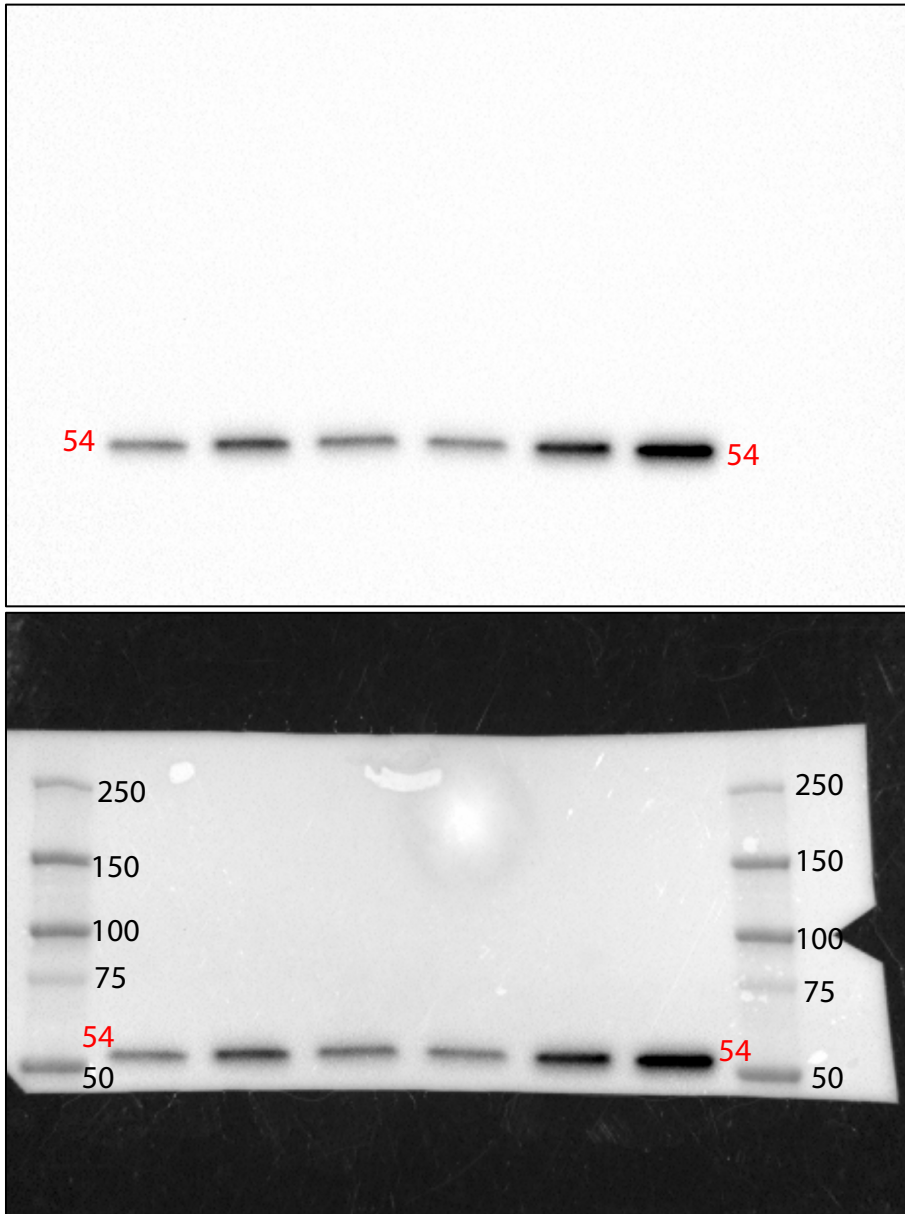

GAPDH

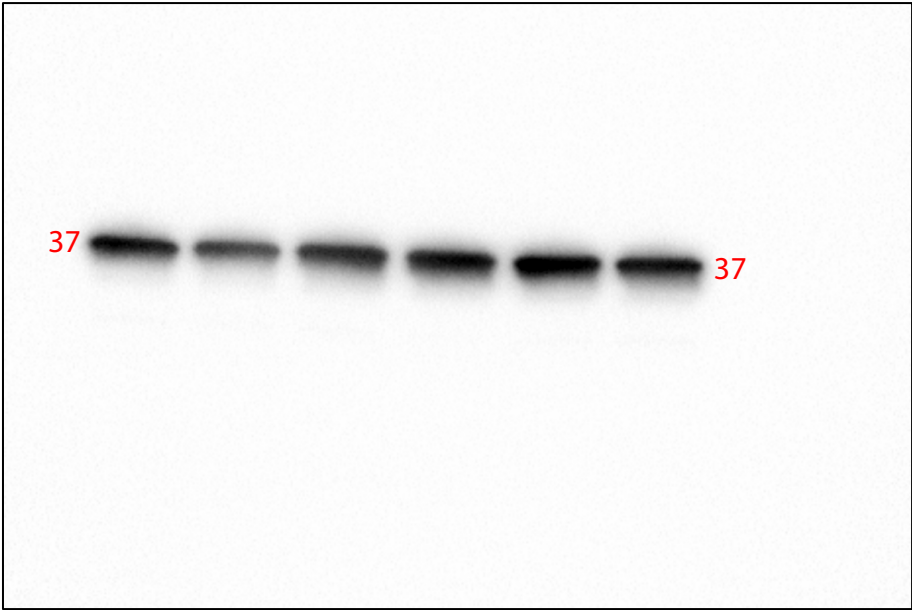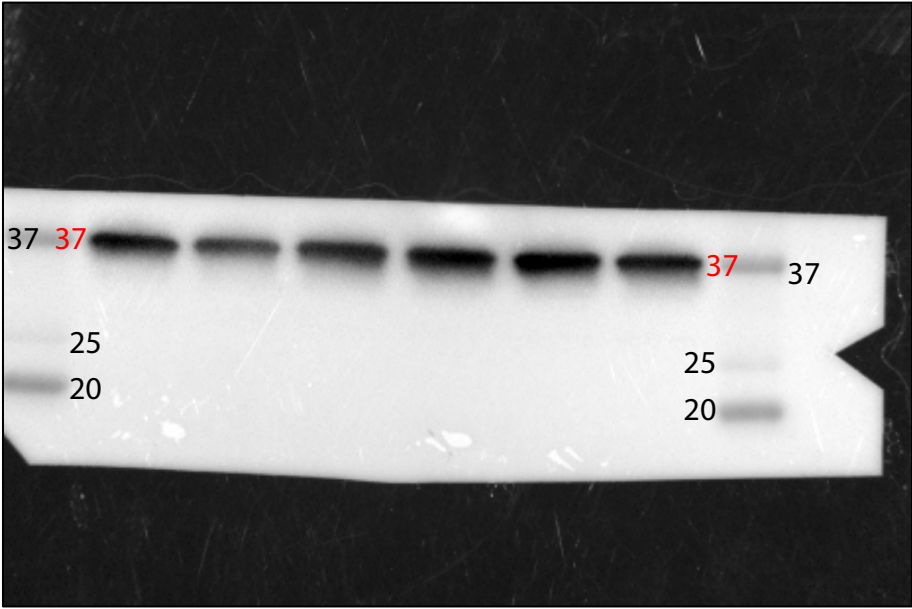



SUM159

PTEN

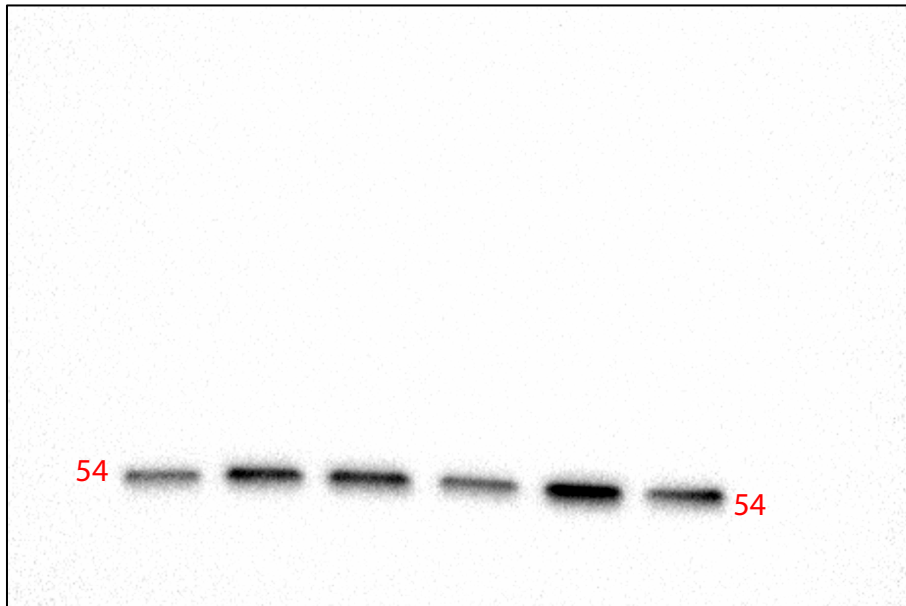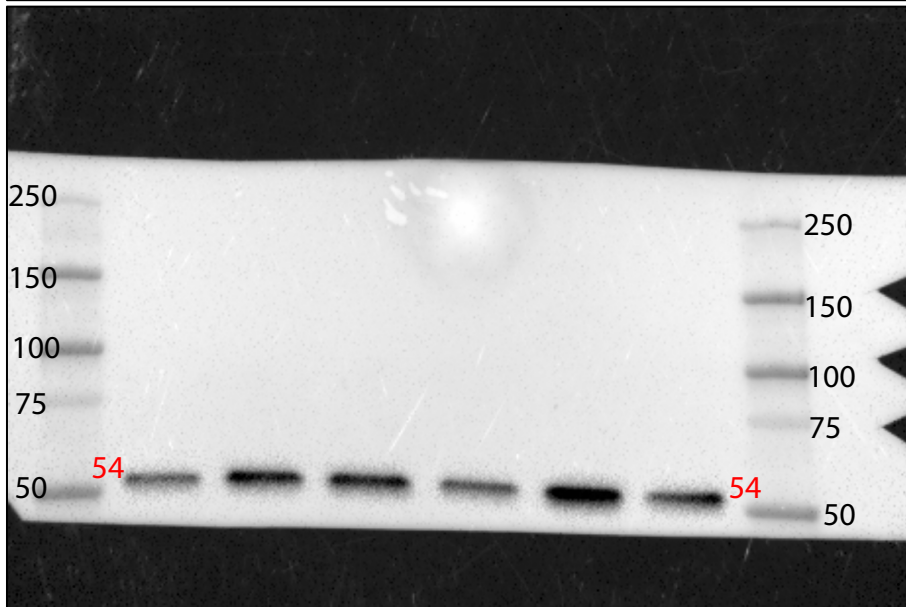

GAPDH

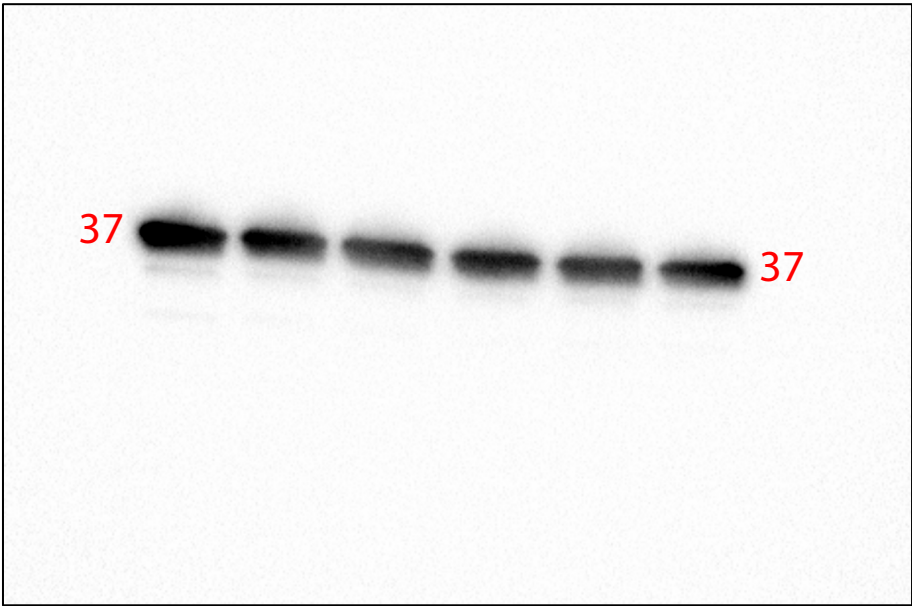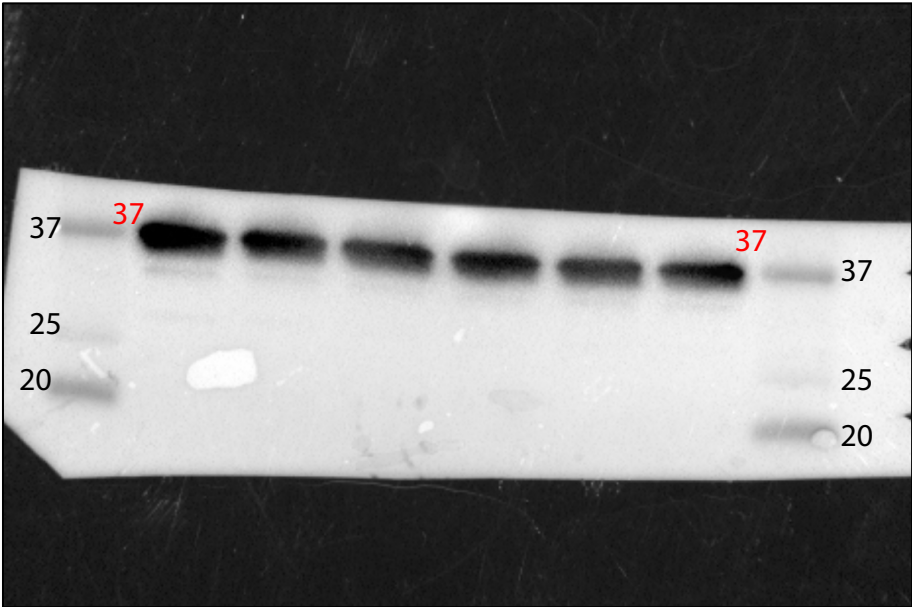

Western blots from Figure 3

SK-MEL-28

PTEN

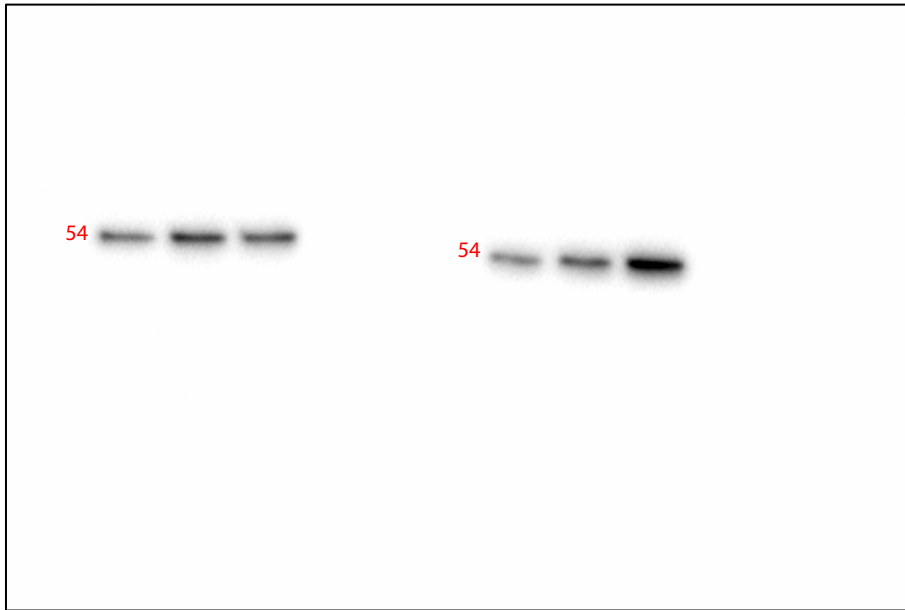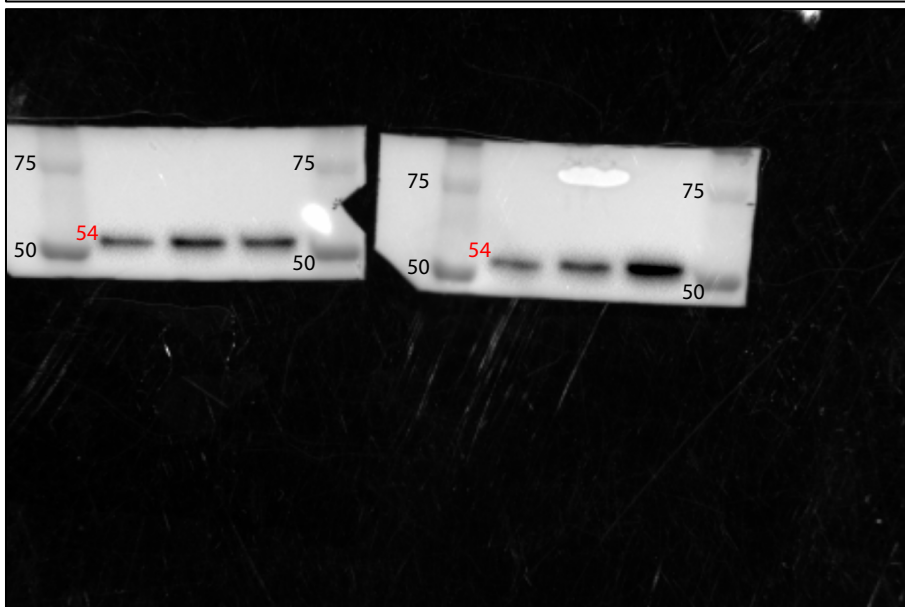

p-AKT S473

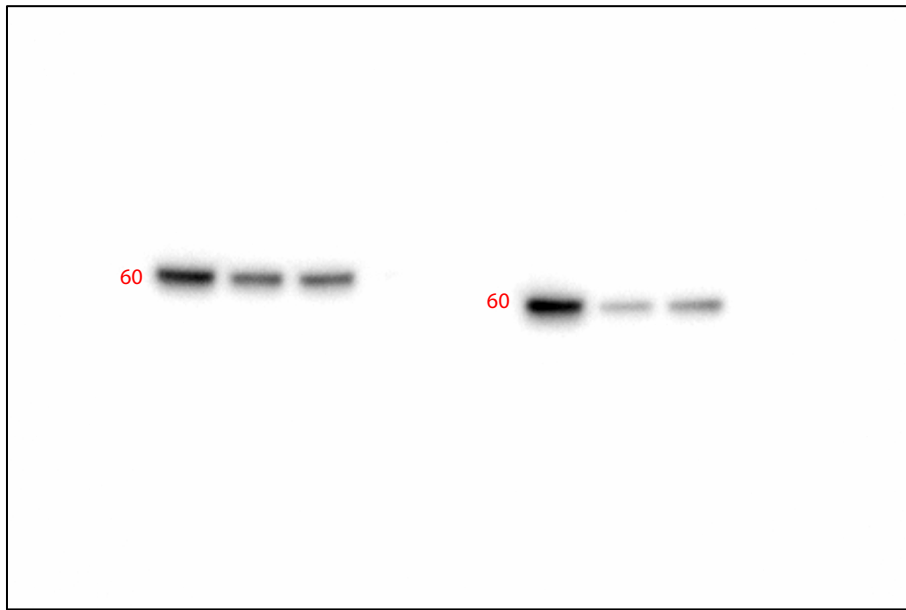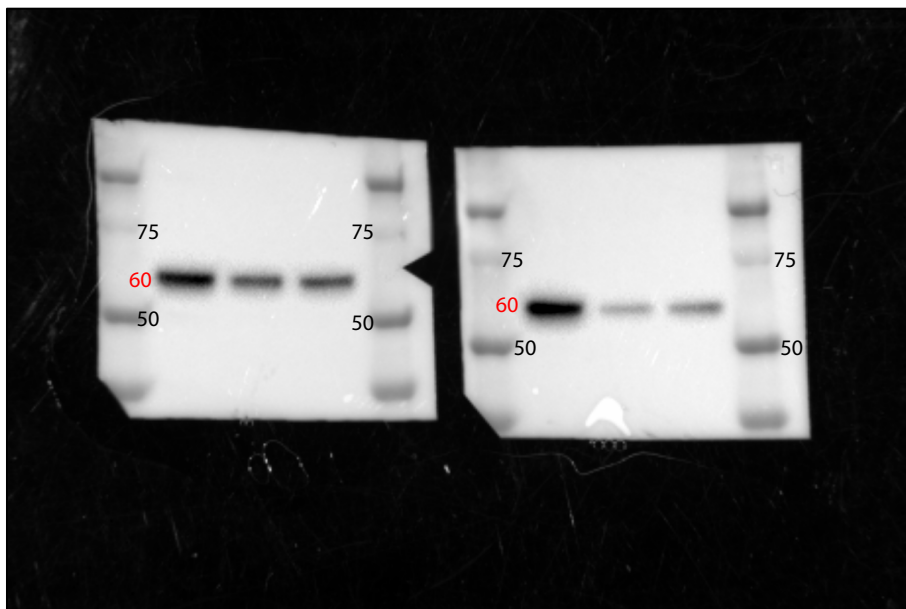

p-AKT T308

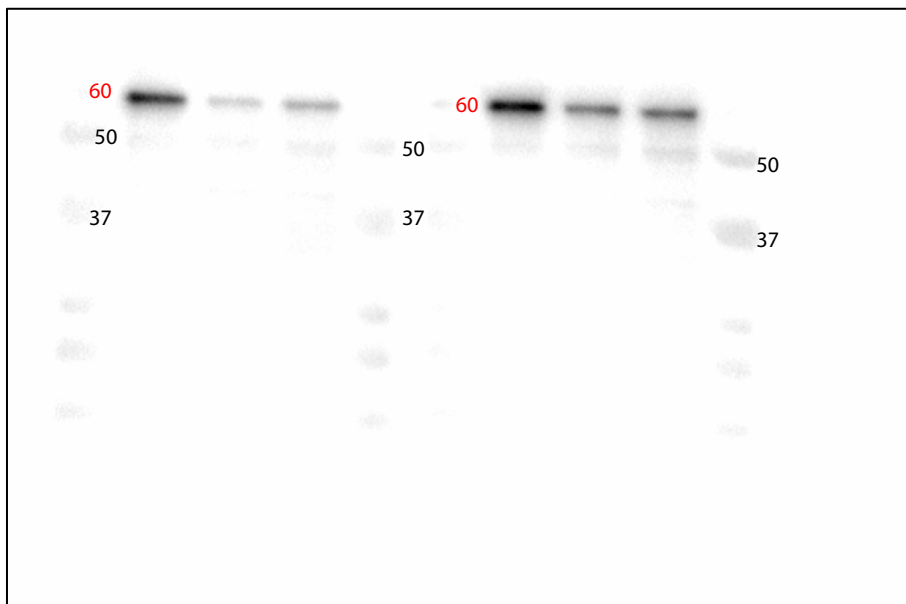

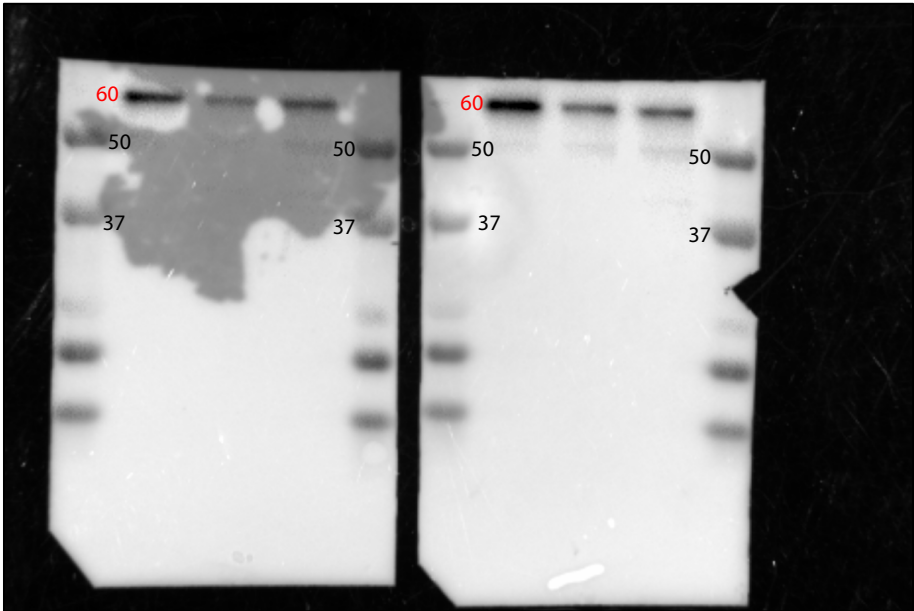

AKT

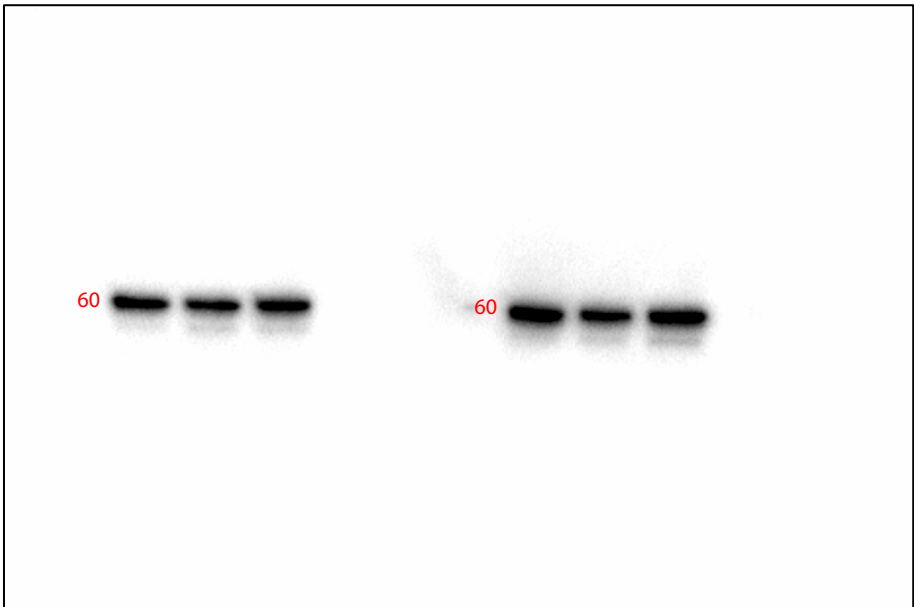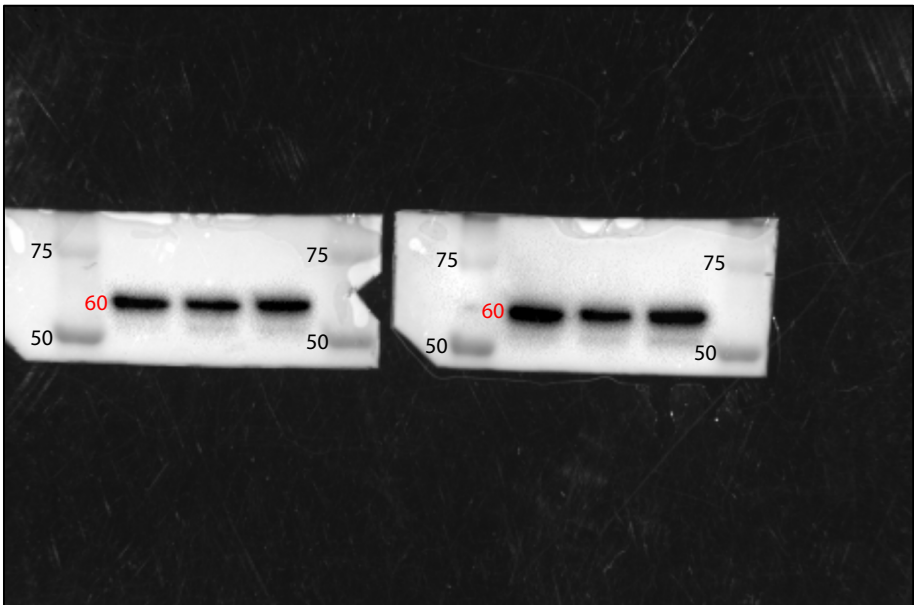

p-mTOR S2481

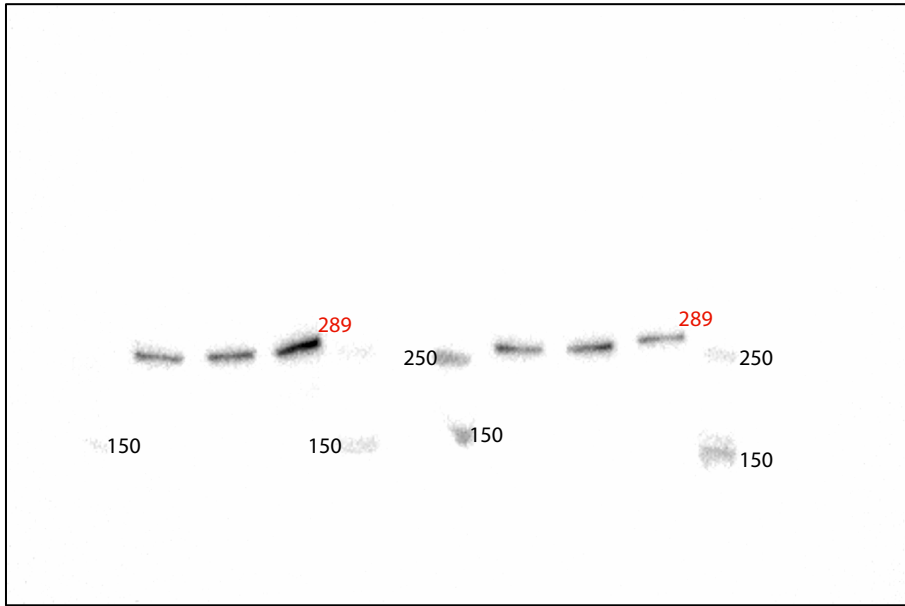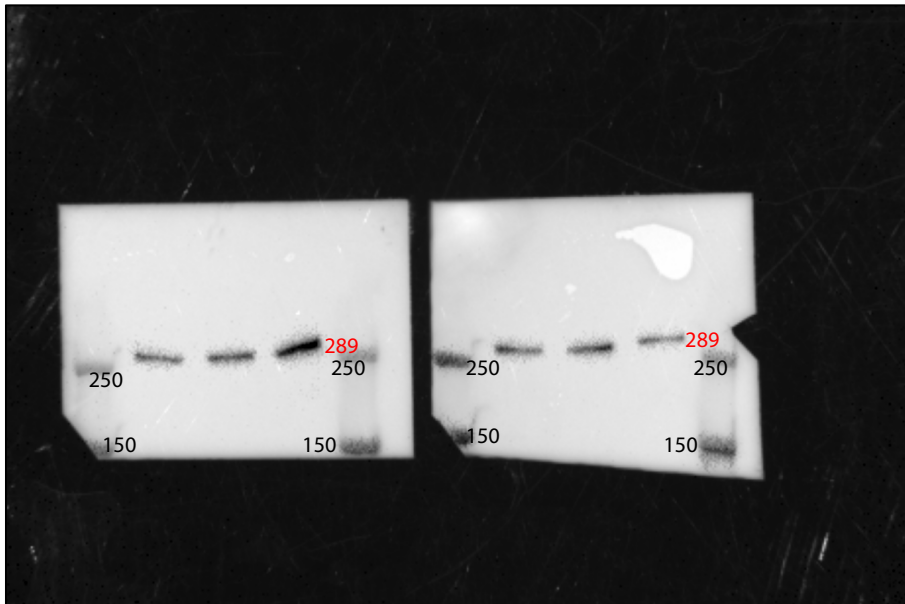

p-mTOR S2448

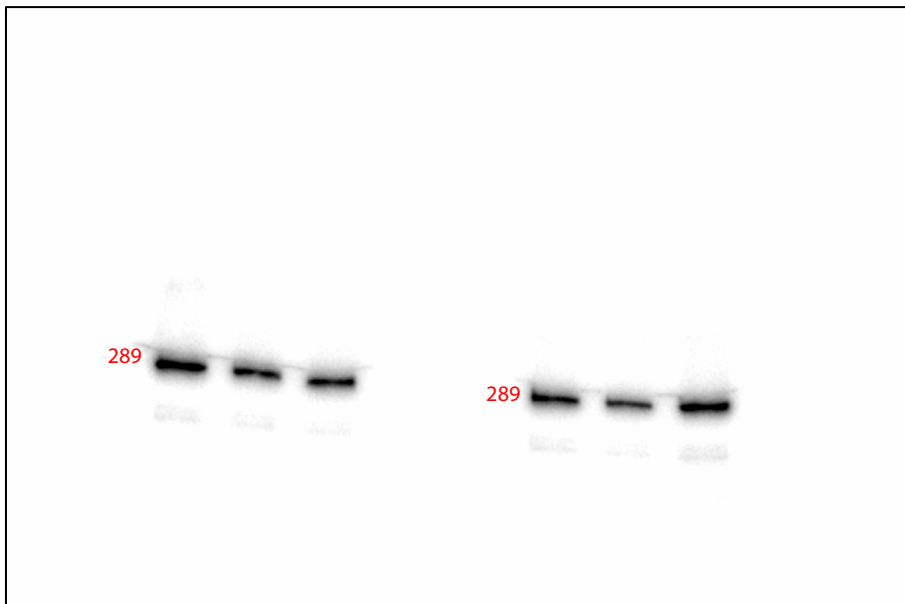

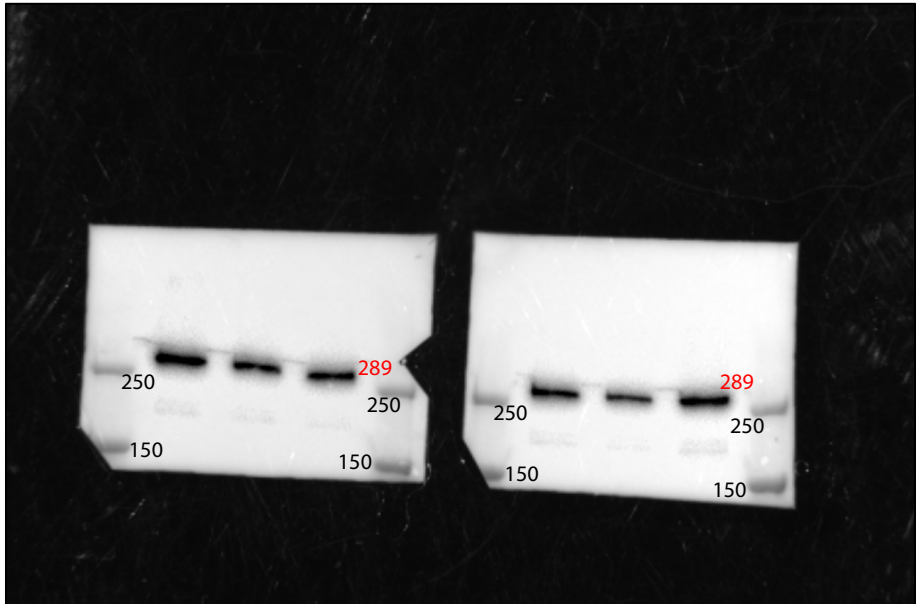

p-p44/42 MAPK

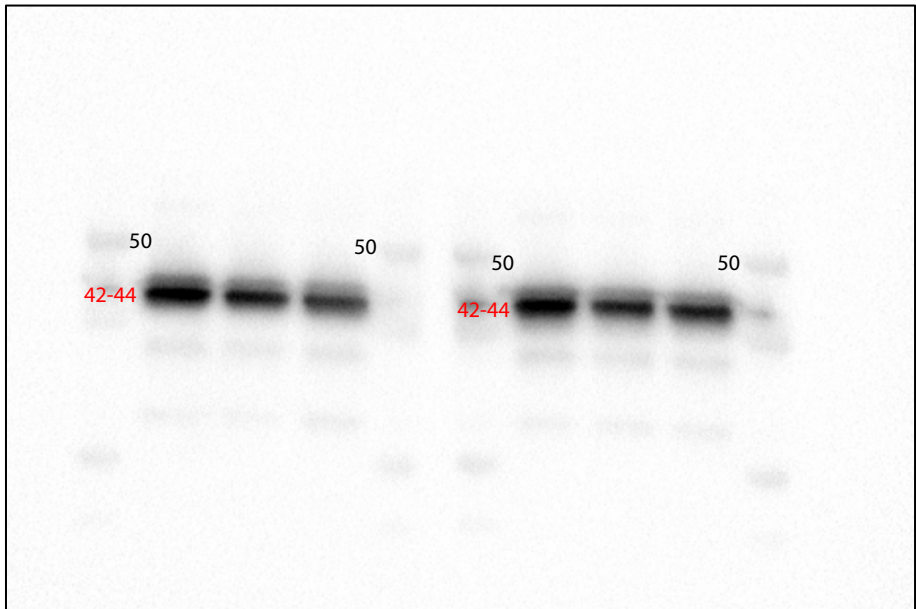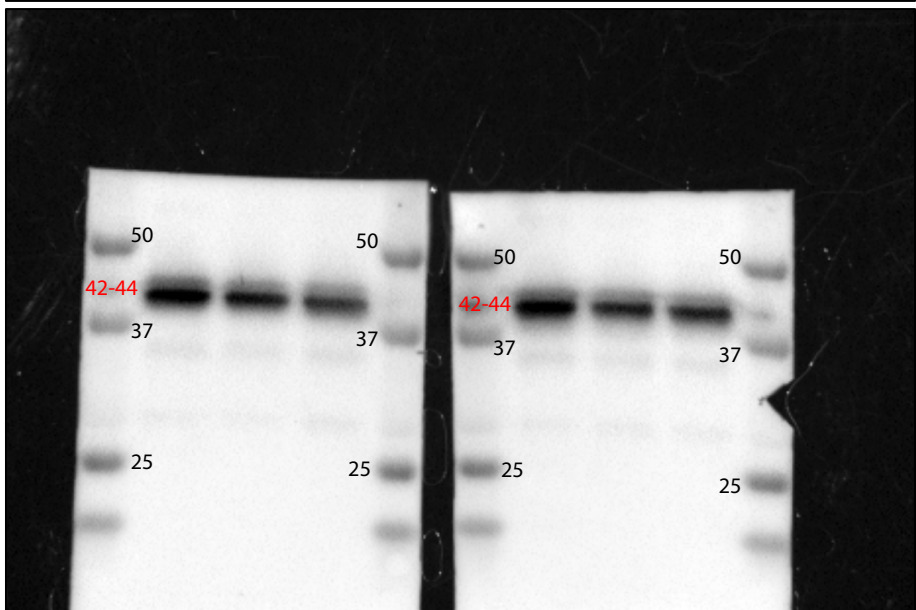

GAPDH

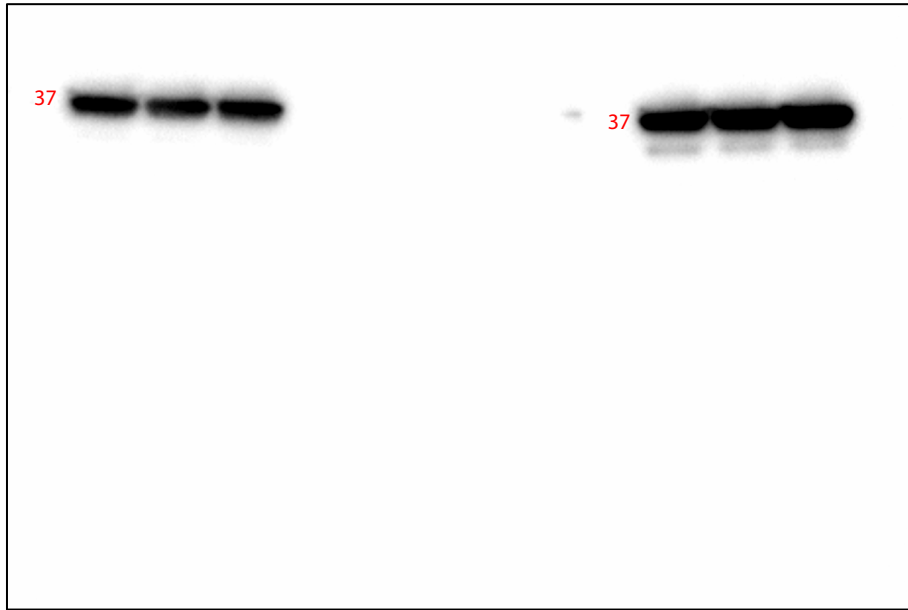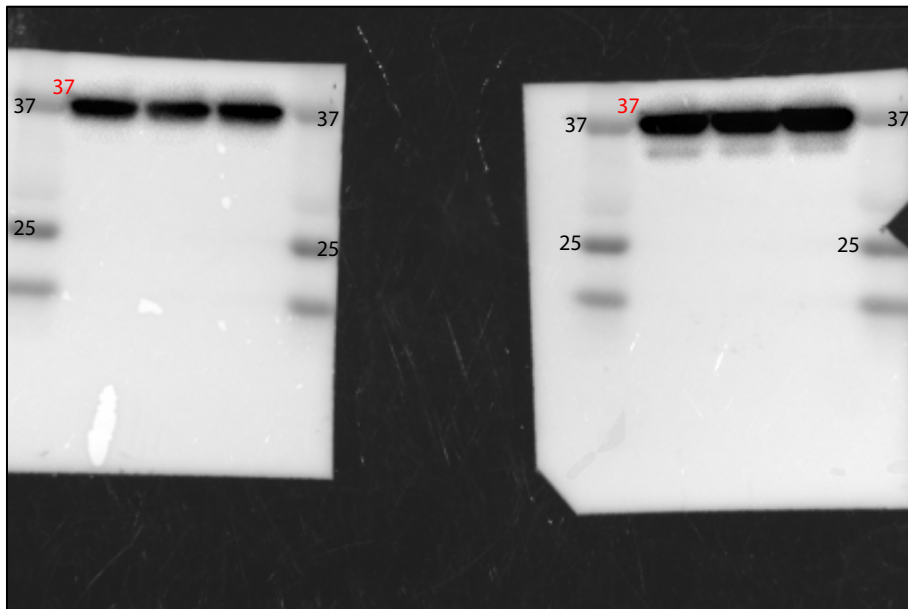



SUM159

PTEN

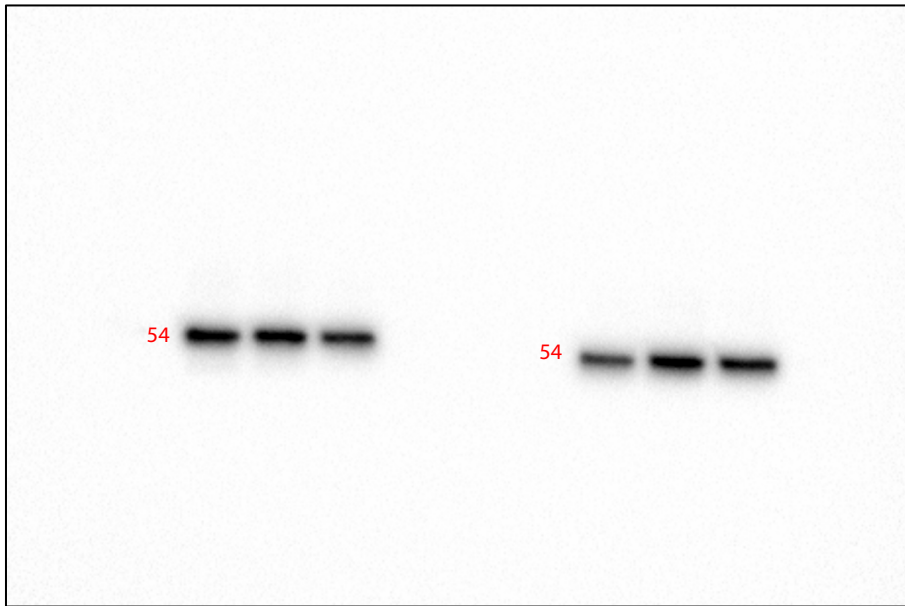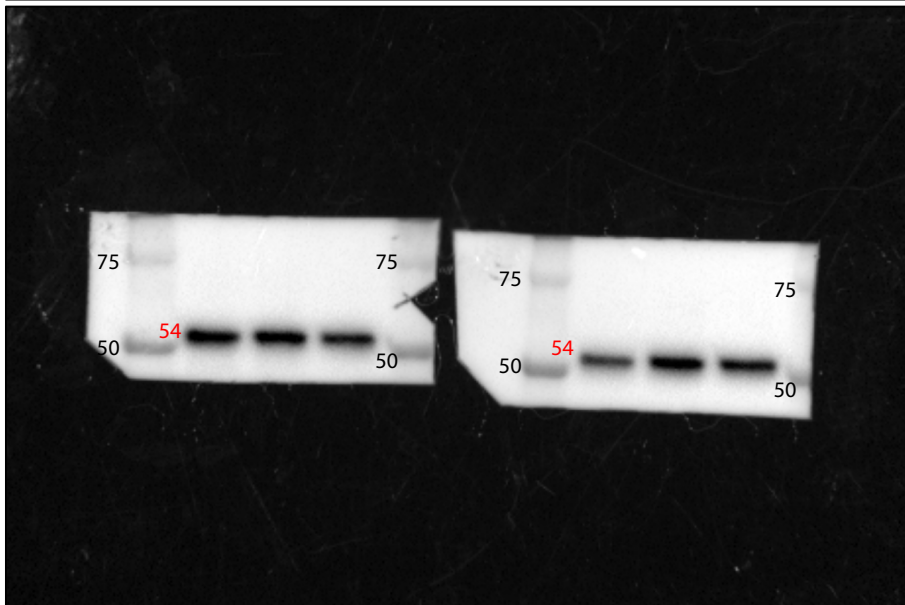

p-AKT S473

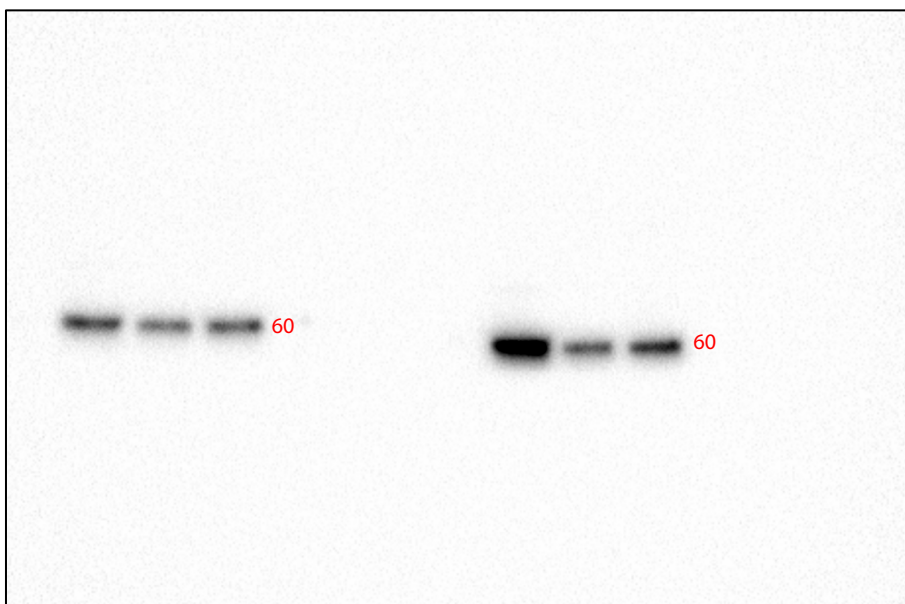

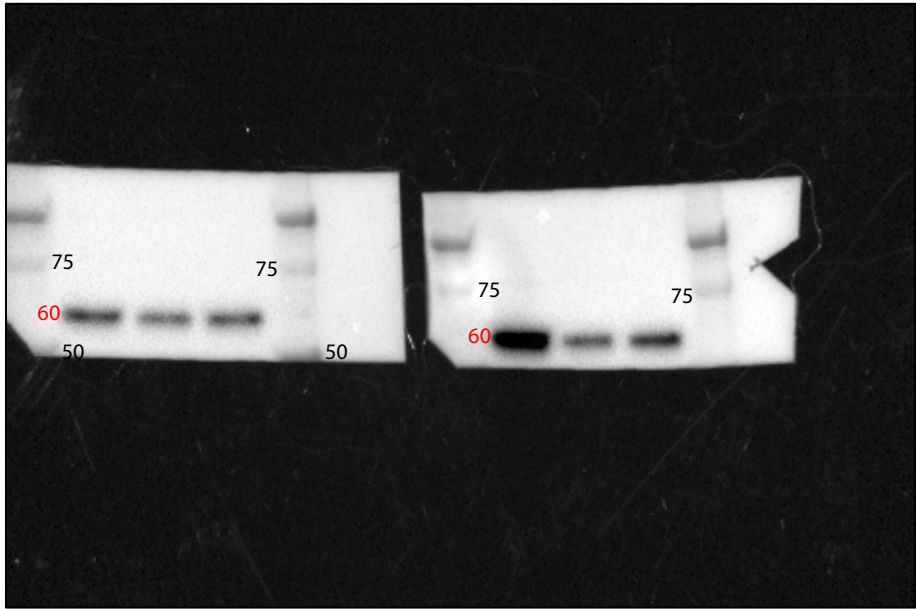

p-AKT T308

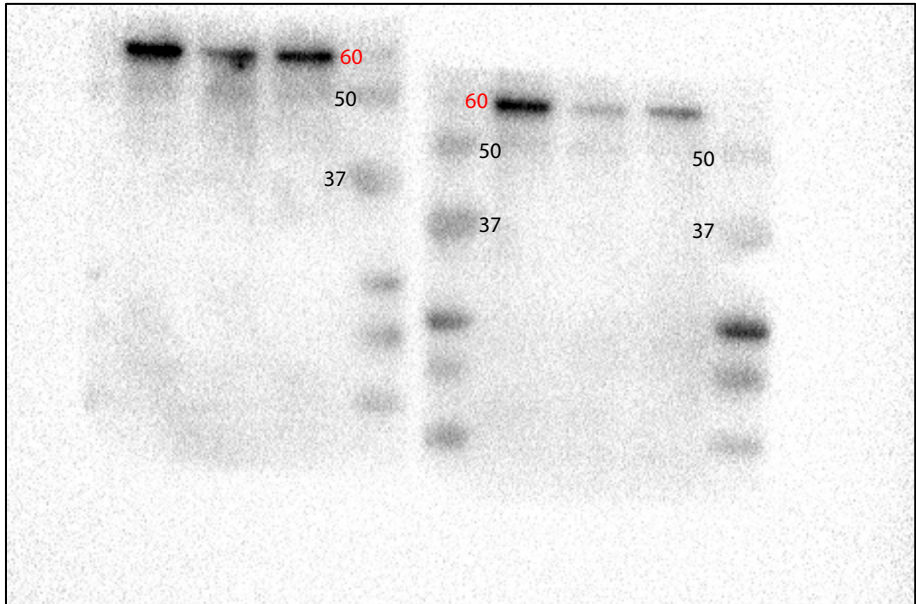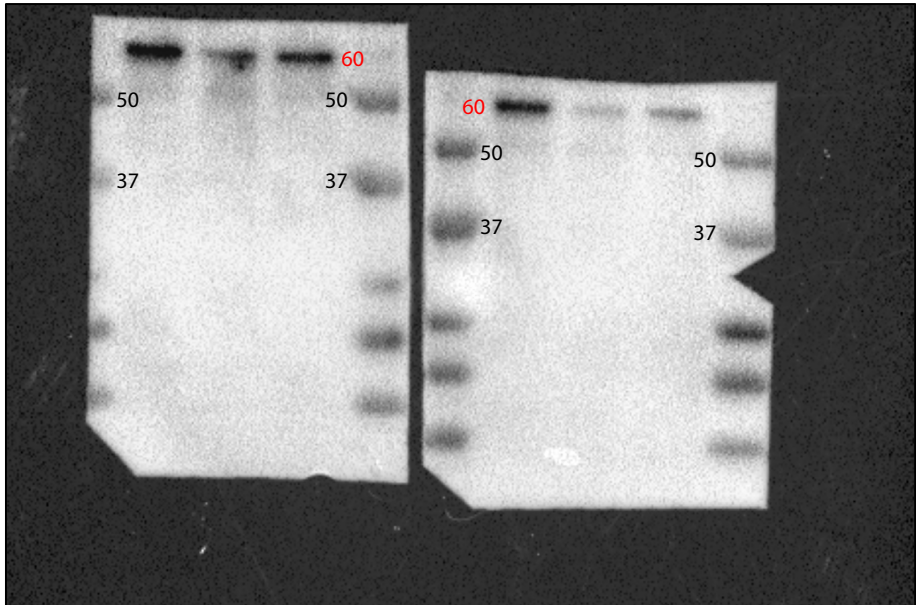

AKT

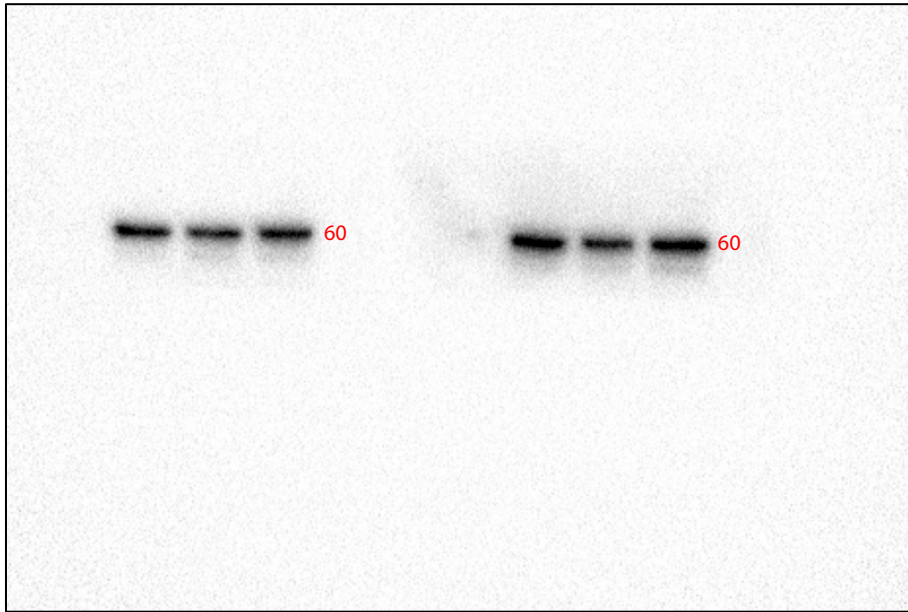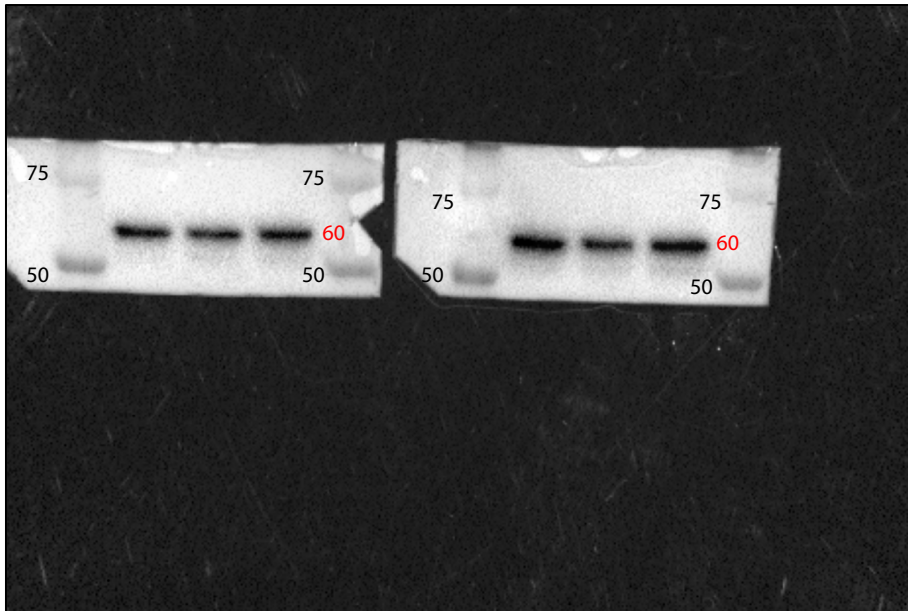

p-mTOR S2481

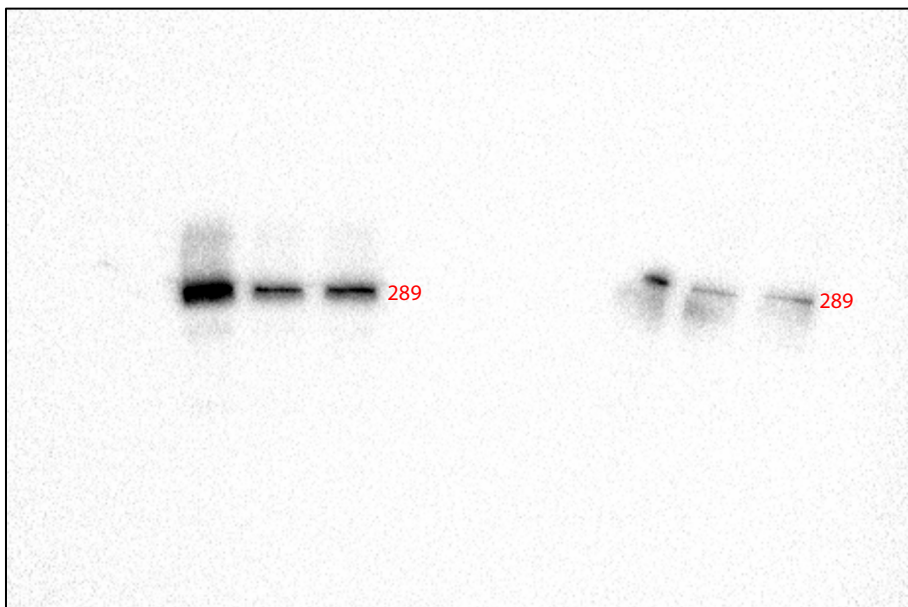

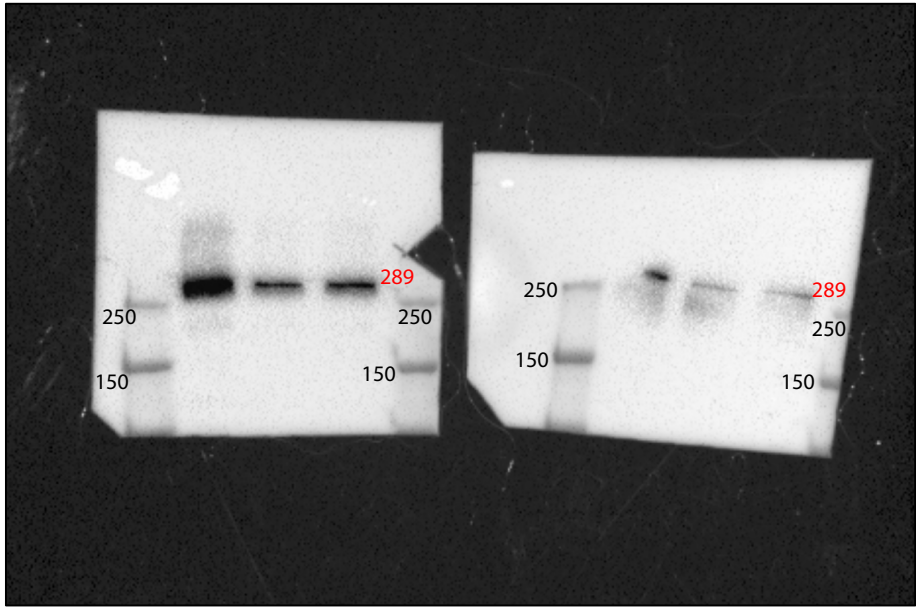

p-mTOR S2448

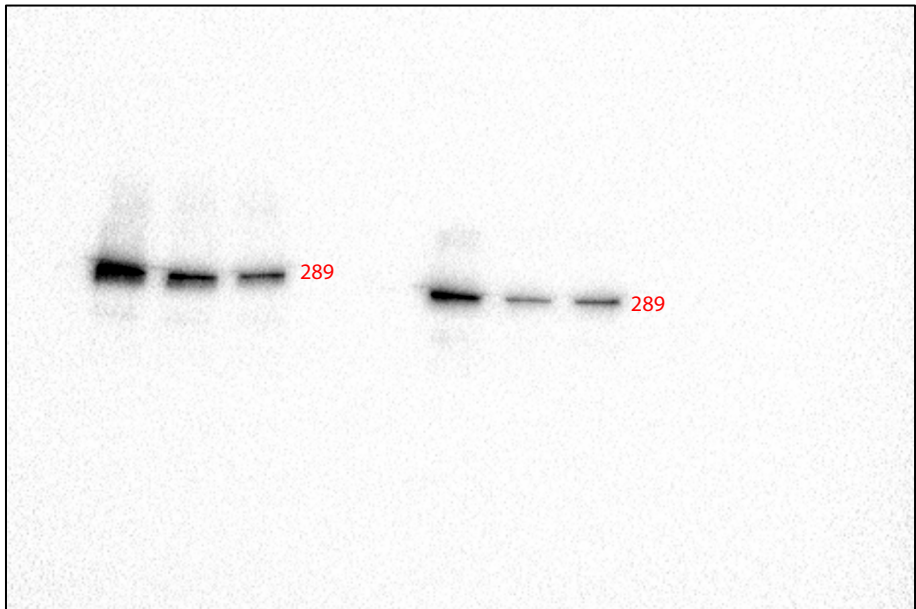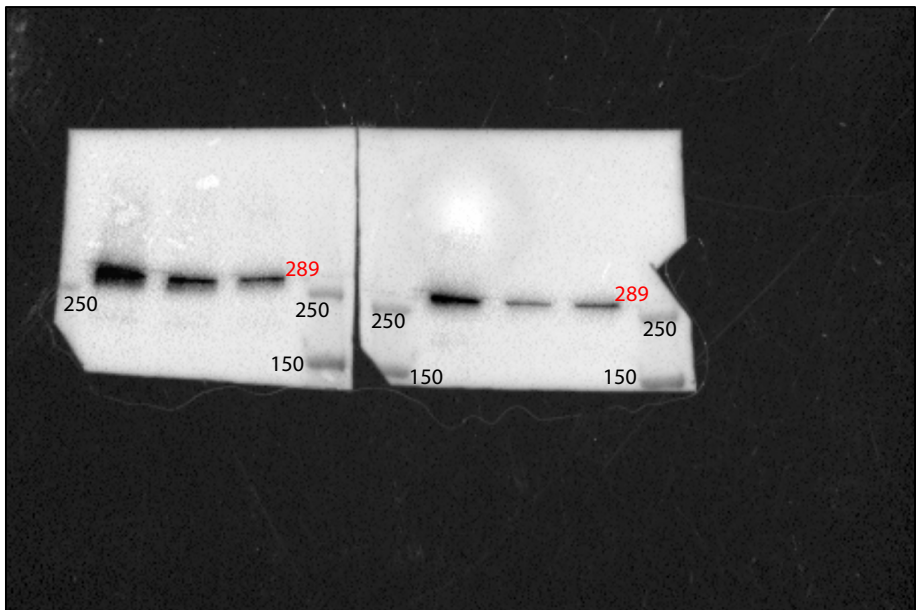

p-p44/42 MAPK

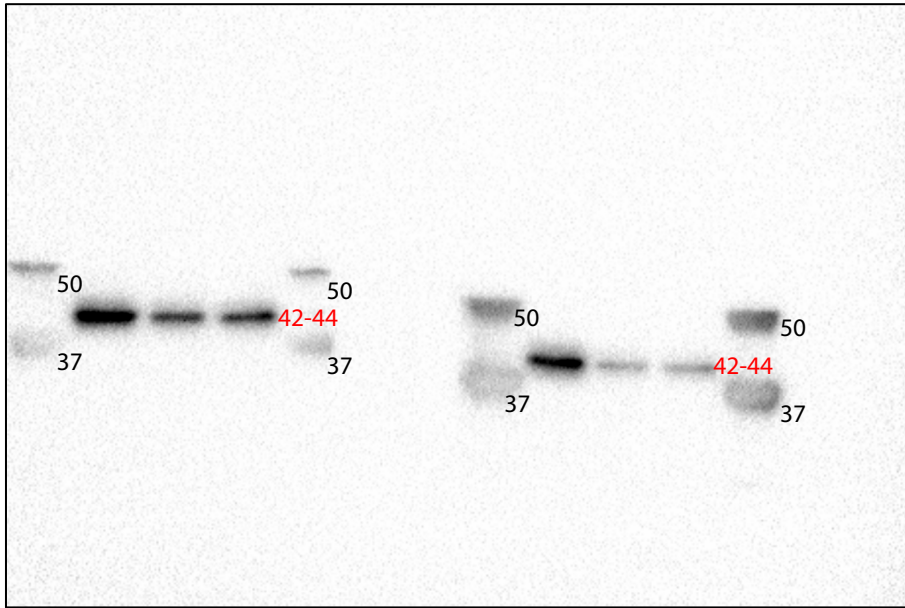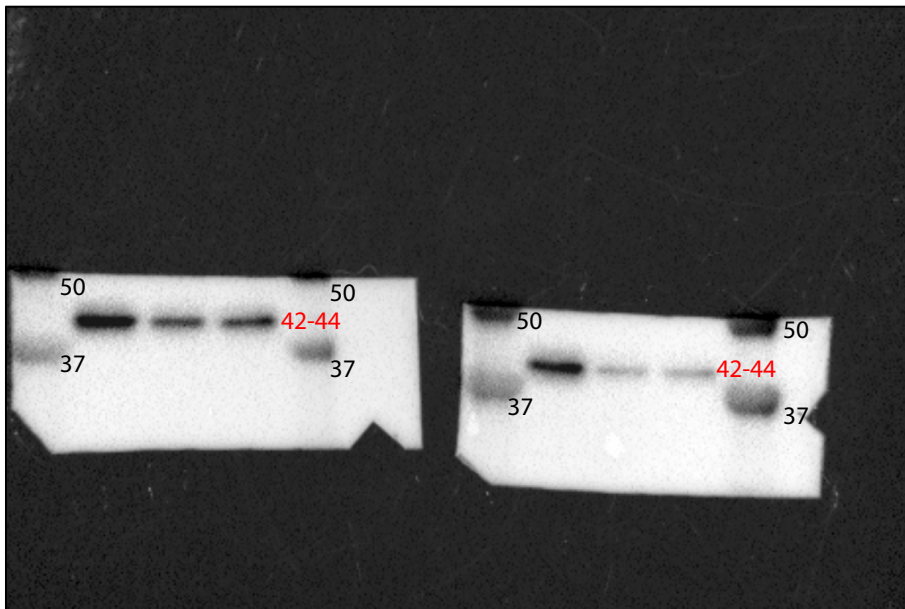

GAPDH

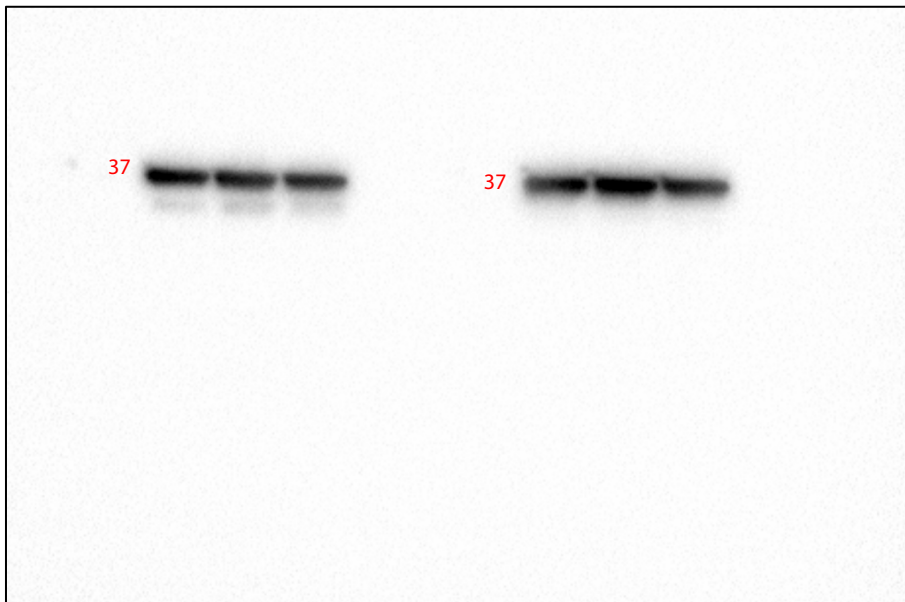

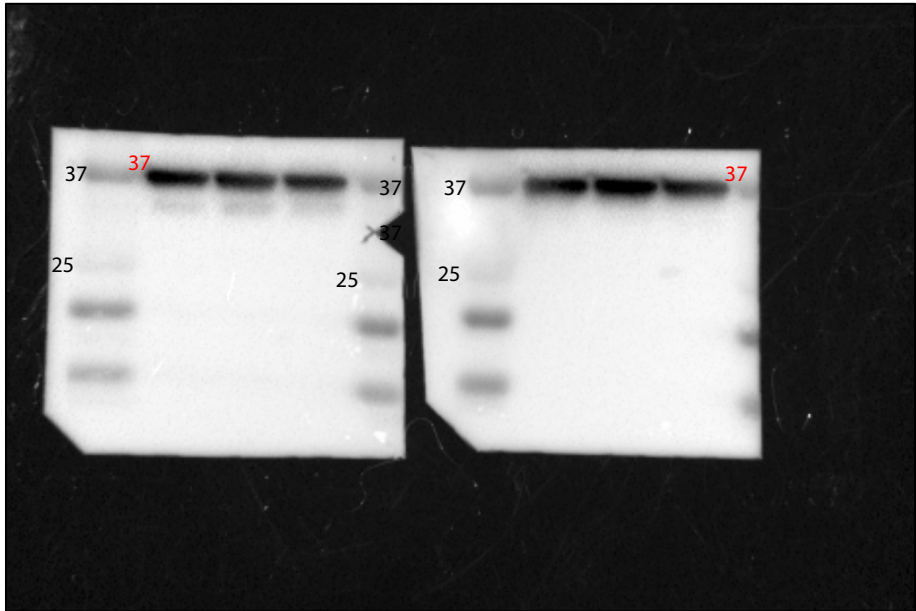

**Supplementary Table 1. Characteristics of melanoma and triple negative breast cancer (TNBC) cell lines used in the study.** For each cell line, the cancer type, *PTEN* genetic mutation or deletion status, *PTEN* proximal promoter DNA methylation and histone modification status, and *PTEN* mRNA abundance in qRT-PCR is indicated.

| Cell line   | Cancer type                                | <i>PTEN</i> genetic mutation or deletion <sup>#</sup>                                            | <i>PTEN</i> promoter DNA methylation <sup>*</sup> | <i>PTEN</i> transcript abundance relative to normal-like cells <sup>+</sup> |
|-------------|--------------------------------------------|--------------------------------------------------------------------------------------------------|---------------------------------------------------|-----------------------------------------------------------------------------|
| Melanocytes | Primary normal human epidermal melanocytes | WT [1]                                                                                           | NA                                                | -                                                                           |
| WM164       | Melanoma                                   | WT [2]                                                                                           | NA                                                | 0.22 (±0.09)                                                                |
| SK-MEL-28   | Melanoma                                   | WT [2]                                                                                           | Yes                                               | 0.21 (±0.18)                                                                |
| WM793       | Melanoma                                   | Mut:<br>Deletion exon 8, hemizygous [2]                                                          | Yes                                               | 0.06 (±0.08)                                                                |
| WM266-4     | Melanoma                                   | Mut:<br>Deletion exon 6, homozygous [2]                                                          | No                                                | 0.04 (±0.14)                                                                |
| MCF-10A     | Normal-like immortalized breast epithelium | WT [3]                                                                                           | NA                                                | -                                                                           |
| MDA-MB-468  | TNBC                                       | Mut:<br>Deletion codon 70, hemizygous; missense mutation IVS4+1G>T, frameshift*5, hemizygous [4] | No                                                | 0.63 (±0.07)                                                                |
| ZR-75-1     | TNBC                                       | Mut:<br>T323G>L108R [4]                                                                          | No                                                | 0.37 (±0.06)                                                                |
| BT-549      | TNBC                                       | Mut:<br>1 base pair deletion exon 8, frameshift*1, homozygous [4]                                | Yes                                               | 0.23 (±0.07)                                                                |
| SUM159      | TNBC                                       | WT [5]                                                                                           | NA                                                | 0.19 (±0.06)                                                                |

<sup>#</sup> WT: wildtype *PTEN*. Mut: *PTEN* mutation or deletion.

<sup>\*</sup> *PTEN* promoter methylation data was accessed from the Broad Institute Cancer Cell Line Encyclopedia (CCLE). No: DNA methylation  $\beta$  value  $\leq$  0.5. Yes: DNA methylation  $\beta$  value  $>$  0.5. NA: Methylation data not available in CCLE.

<sup>+</sup> *PTEN* transcript abundance was determined by qRT-PCR (data displayed in Fig. 1D-E). Values in brackets represent standard error of the mean (SEM).

## References:

- 1 Conde-Perez A, Gros G, Longvert C, Pedersen M, Petit V, Aktary Z, Viros A, Gesbert F, Delmas V, Rambow F, Bastian BC, Campbell AD, Colombo S et al. A caveolin-dependent and PI3K/AKT-independent role of PTEN in beta-catenin transcriptional activity. *Nat Commun.* 2015; 6: 8093.
- 2 Paraiso KH, Xiang Y, Rebecca VW, Abel EV, Chen YA, Munko AC, Wood E, Fedorenko IV, Sondak VK, Anderson AR. PTEN loss confers BRAF inhibitor resistance to melanoma cells through the suppression of BIM expression. *Cancer Res.* 2011; 71: 2750-2760.
- 3 Vitolo MI, Weiss MB, Szmackinski M, Tahir K, Waldman T, Park BH, Martin SS, Weber DJ, Bachman KE. Deletion of PTEN promotes tumorigenic signaling, resistance to anoikis, and altered response to chemotherapeutic agents in Human Mammary Epithelial Cells. *Cancer Res.* 2009; 69: 8275-8283.
- 4 Meric-Bernstam F, Akcakanat A, Chen H, Do KA, Sangai T, Adkins F, Gonzalez-Angulo AM, Rashid A, Crosby K, Dong M, Phan AT, Wolff RA, Gupta S et al. PIK3CA/PTEN mutations and Akt activation as markers of sensitivity to allosteric mTOR inhibitors. *Clin Cancer Res.* 2012; 18: 1777-1789.
- 5 Korkaya H, Paulson A, Charafe-Jauffret E, Ginestier C, Brown M, Dutcher J, Clouthier SG, Wicha MS. Regulation of Mammary Stem/Progenitor Cells by PTEN/Akt/ $\beta$ -Catenin Signaling. *PLoS Biol.* 2009; 7: e1000121.



**Supplementary Table 2. sgRNA recognition sequences for *PTEN* activation.** sgRNA numbering refers to start position relative to the transcription start site (TSS) of *PTEN* mRNA transcript variant 1. The numbering of the start and end of each sgRNA is given according to the Genome Reference Consortium Human Build 38 (GRCh38). PAM: protospacer-adjacent motif; F: forward strand guide; R: reverse strand guide.

| sgRNA | Recognition sequence  | PAM | F/R | Start    | End      | Off-target score <sup>1</sup> | On-target score <sup>2</sup> |
|-------|-----------------------|-----|-----|----------|----------|-------------------------------|------------------------------|
| -241  | AGCCTACCCTGCCTCCGGCT  | GGG | F   | 87863197 | 87863216 | 63.9                          | 45.2                         |
| -181  | GAGGATAACGAGCTAAGCCT  | CGG | R   | 87863256 | 87863237 | 80.3                          | 66.3                         |
| -86   | GCATGCCCCAGTGTAGCTGCC | TGG | R   | 87863351 | 87863332 | 67.2                          | 31.4                         |
| -54   | GCGCAGAGTCCCCAAGCCGC  | AGG | R   | 87863383 | 87863364 | 80.1                          | 45.4                         |

**References:**

1. Hsu, P.D., Scott, D.A., Weinstein, J.A., Ran, F.A., Konermann, S., Agarwala, V., et al. (2013). DNA targeting specificity of RNA-guided Cas9 nucleases. *Nat Biotechnol* 31, 827-832.
2. Doench, J.G., Fusi, N., Sullender, M., Hegde, M., Vaimberg, E.W., Donovan, K.F., et al. (2016). Optimized sgRNA design to maximize activity and minimize off-target effects of CRISPR-Cas9. *Nat Biotechnol* 34, 184-191.

**Supplementary Table 4. TaqMan Gene Expression Assays used for qRT-PCR in *PTEN* activation experiments.** For each gene, the TaqMan Assay ID, targeted RefSeq transcripts, and reporter dye are listed.

| Gene           | Assay ID      | RefSeq sequence(s)                                                | Dye     |
|----------------|---------------|-------------------------------------------------------------------|---------|
| <i>PTEN</i>    | Hs02621230_s1 | NM_000314.6<br>NM_001304717.2<br>NM_001304718.1                   | FAM-MGB |
| <i>GAPDH</i>   | Hs02786624_g1 | NM_001256799.2<br>NM_001289745.1<br>NM_001289746.1<br>NM_002046.5 | FAM-MGB |
| <i>GUSB</i>    | Hs00939627_m1 | NM_000181.3<br>NM_001284290.1<br>NM_001293104.1<br>NM_001293105.1 | FAM-MGB |
| <i>COL11A2</i> | Hs00899176_m1 | NM_080679.2<br>NM_080680.2<br>NM_080681.2                         | FAM-MGB |
| <i>SAMD11</i>  | Hs00942141_m1 | NM_152486.2                                                       | FAM-MGB |

**Supplementary Table 5. Primers used for QuantiFast SYBR Green qRT-PCR in *PTEN* activation experiments.** For each gene, the forward and reverse primer sequences and product size are listed.

| Gene             | Forward primer       | Reverse primer        | Product size |
|------------------|----------------------|-----------------------|--------------|
| <i>RAB11FIP1</i> | CAGAACCAGAAGCTGAGCCA | TGGAGACACTTCCAGTCGGG  | 107          |
| <i>ATP23</i>     | ACCAGAAGTGCCAGCTTAGG | AACAGCACAACTGAGTGTTTC | 95           |
| <i>PRCD</i>      | CGATTTGCCAACCGAGTCC  | TTCTTTCTCCCTGCCTGAGGA | 102          |
| <i>MFSD6</i>     | TTGGGAAGAGGATGTGGTGC | ACTGGATCAGGGCAAAGAGC  | 124          |
| <i>CDYL</i>      | CGAGGAGCTGTACGAGGTG  | CTCACAGTTCACGAGGTGCT  | 139          |
| <i>COX17</i>     | GTCATAGCTGCTTTTGGCG  | TCACACAGCAGACCACCATT  | 238          |
| <i>FOXD1</i>     | ATTGAACCCGAGAACGTCCG | TCAGATGCGTGCGTTACAGA  | 123          |

**Supplementary Table 6. Antibodies used for Western blotting in *PTEN* activation experiments.** For each antibody, the isotype, manufacturer, catalogue number, molecular weight of the antigen, and dilution factor used in *PTEN* activation experiments are listed.

| Antibody      | Isotype    | Manufacturer              | Cat. no.        | Molecular weight | Dilution |
|---------------|------------|---------------------------|-----------------|------------------|----------|
| PTEN          | Rabbit IgG | CST                       | 9559            | 54 kDa           | 1/1000   |
| GAPDH         | Rabbit IgG | CST                       | 2118            | 37 kDa           | 1/5000   |
| AKT           | Rabbit IgG | CST                       | 9272            | 60 kDa           | 1/2000   |
| p-AKT S473    | Rabbit IgG | CST                       | 4060            | 60 kDa           | 1/2000   |
| p-AKT T308    | Rabbit IgG | CST                       | 13038           | 60 kDa           | 1/2000   |
| p-mTOR S2481  | Rabbit IgG | CST                       | 2974            | 289 kDa          | 1/2000   |
| p-mTOR S2448  | Rabbit IgG | CST                       | 5536            | 289 kDa          | 1/2000   |
| p-p44/42 MAPK | Rabbit IgG | CST                       | 4370            | 42, 44 kDa       | 1/2000   |
| Rabbit-HRP    | Goat IgG   | Jackson<br>ImmunoResearch | 111-035-<br>144 | —                | 1/10 000 |
| Mouse-HRP     | Goat IgG   | Jackson<br>ImmunoResearch | 115-035-<br>003 | —                | 1/10 000 |

**Supplementary Table 7. Antibodies and detection reagents used for immunofluorescence in *PTEN* activation experiments.** For each antibody or reagent, the isotype, manufacturer, catalogue number and dilution factor in *PTEN* activation experiments are listed.

| Antibody/reagent       | Isotype    | Manufacturer      | Cat. no. | Dilution |
|------------------------|------------|-------------------|----------|----------|
| PTEN                   | Rabbit IgG | CST               | 9559     | 1/300    |
| Ki67                   | Mouse IgG  | CST               | 9449     | 1/500    |
| Rabbit-Alexa Fluor 594 | Goat IgG   | Molecular Probes  | R37117   | 1/500    |
| Hoechst 33342 Solution | —          | Thermo Scientific | 62249    | 1/10 000 |
